# Supplementary material for: Influence of fluid viscosity and wetting on multiscale viscoelastic lubrication in soft tribological contacts
Source: Royal Society of Chemistry journal article supplement (doi:10.1039/c6sm02417c), 2017-01-01
Supplement: c6sm02417c1.pdf [file c6sm02417c1.pdf]

## Supplementary Information

### (I) Calculation of Hertzian contact parameters:

The contact radius is given by:

$$a = \sqrt[3]{3WR/4E'}$$

where  $W$  is the load,  $R$  is the PTFE ball radius and  $E'$  is defined by the following equation:

$$\frac{2}{E'} = \frac{1 - \nu_1^2}{E_1} + \frac{1 - \nu_2^2}{E_2}$$

The indentation depth is given by:

$$\delta = \frac{a^2}{R}$$

- (a) For the PTFE ball-PDMS disc contact used in this tribological study, the values of the variables are as follows:

$$W = 2 \text{ N}$$

$$R = 9.25 \text{ mm}, E_1 = 0.5 \text{ GPa (PTFE)}$$

$$E_2 = 2.4 \text{ MPa (PDMS)}$$

$$\nu_1 = 0.5 \text{ (PTFE)}$$

$$\nu_2 = 0.46 \text{ (PDMS)}$$

This yields a contact radius of 1.30 mm and an indentation depth of 182  $\mu\text{m}$ .

- (b) For the PDMS ball-PDMS disc contact used in this tribological study, the values of the variables are as follows:

$$W = 2 \text{ N}$$

$$R = 9.25 \text{ mm}, E_1 = 2.4 \text{ MPa (PDMS)}$$

$$E_2 = 2.4 \text{ MPa (PDMS)}$$

$$\nu_1 = 0.46 \text{ (PDMS)}$$

$$\nu_2 = 0.46 \text{ (PDMS)}$$

This yields a contact radius of 1.90 mm and an indentation depth of 389  $\mu\text{m}$ .

## Supplementary Figures

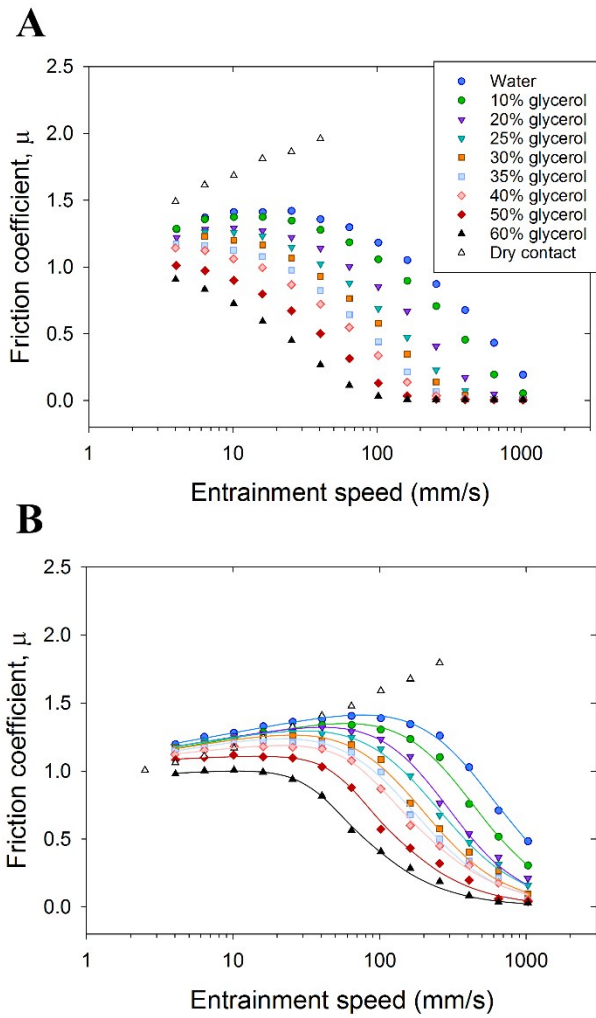

**Figure S1.** The friction coefficient as a function of entrainment velocity for the series of glycerol-water mixtures, as well as the dry contact, for a PDMS ball in tribological contact with (A) a smooth and (B) a rough PDMS disc.

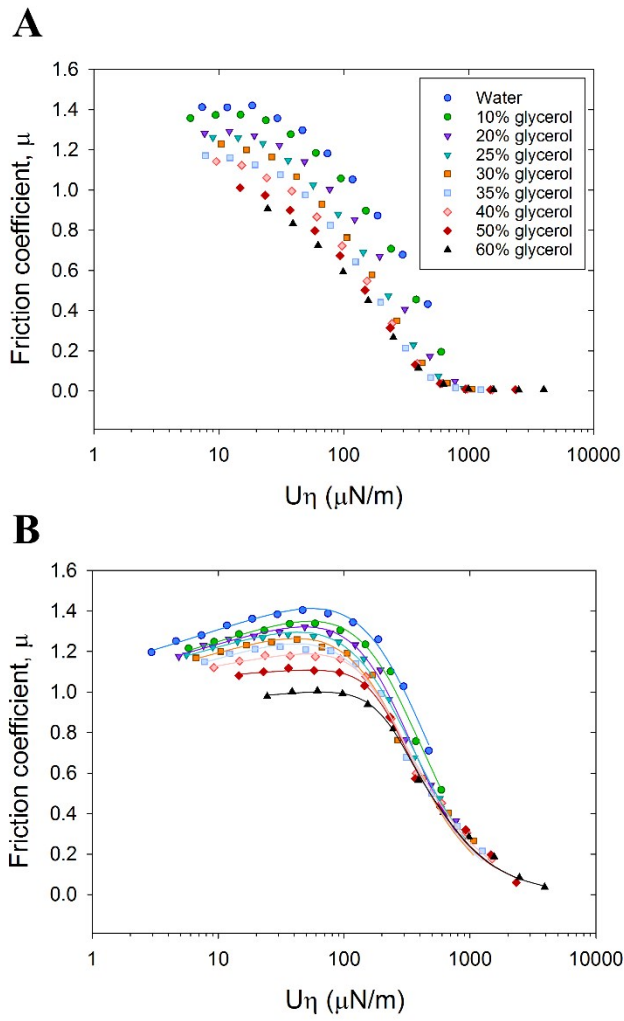

**Figure S2.** The same friction data as in Figure S1, for the series of glycerol-water mixtures, plotted as a function of reduced velocity  $U\eta$  for (A) a smooth and (B) a rough PDMS-PDMS contact.

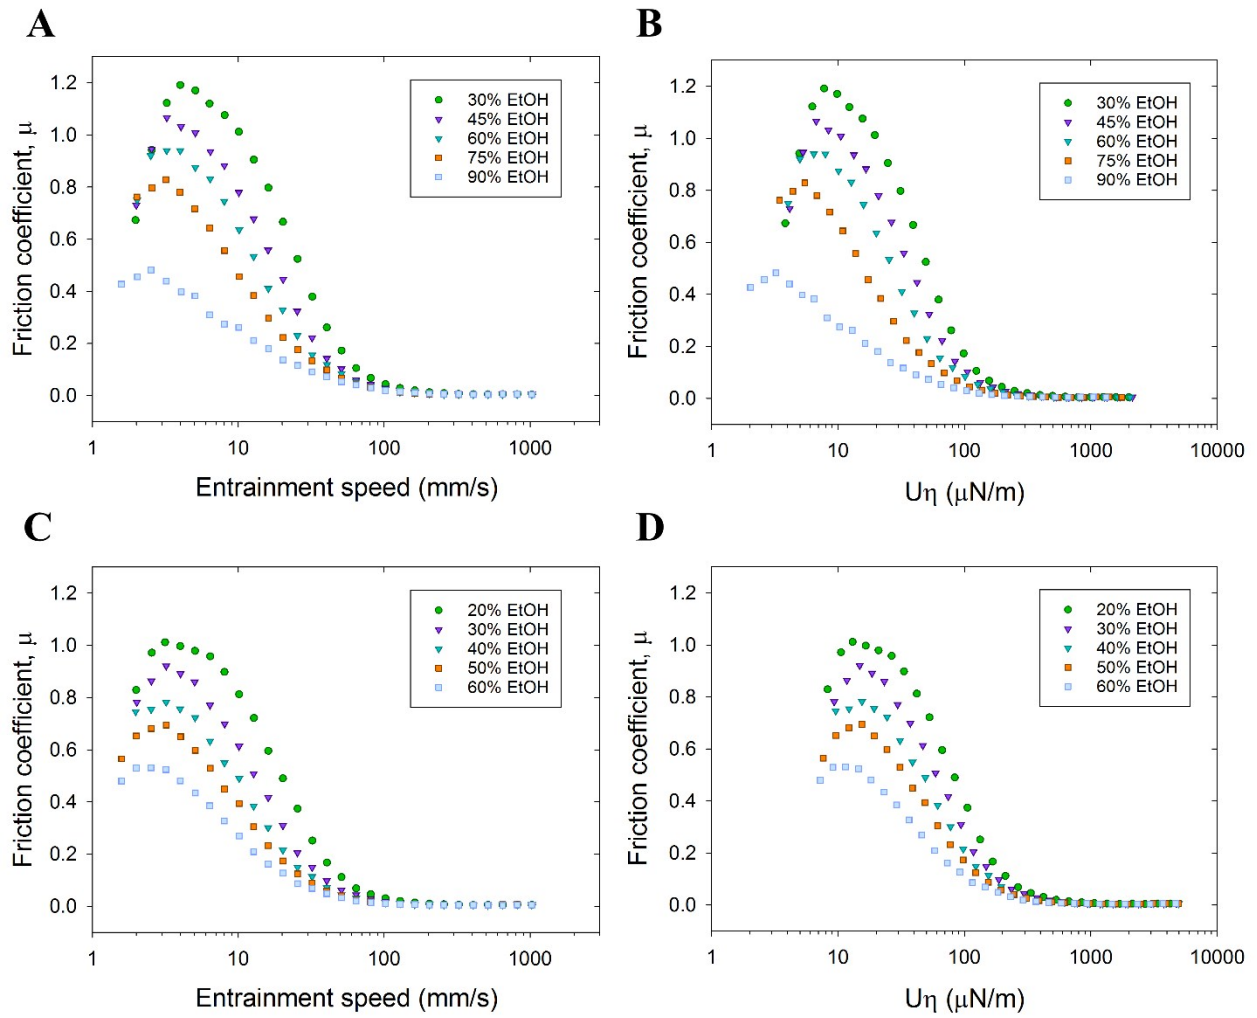

**Figure S3.** Friction profiles measured for the two glycerol-ethanol-water lubricant series in a smooth PDMS-PDMS contact. Data for the low viscosity lubricants ( $\sim 1.8$  mPas) are shown as a function of (A) entrainment speed and (B) reduced velocity, and the corresponding data for the high viscosity lubricants ( $\sim 4.6$  mPas) in (C) and (D).

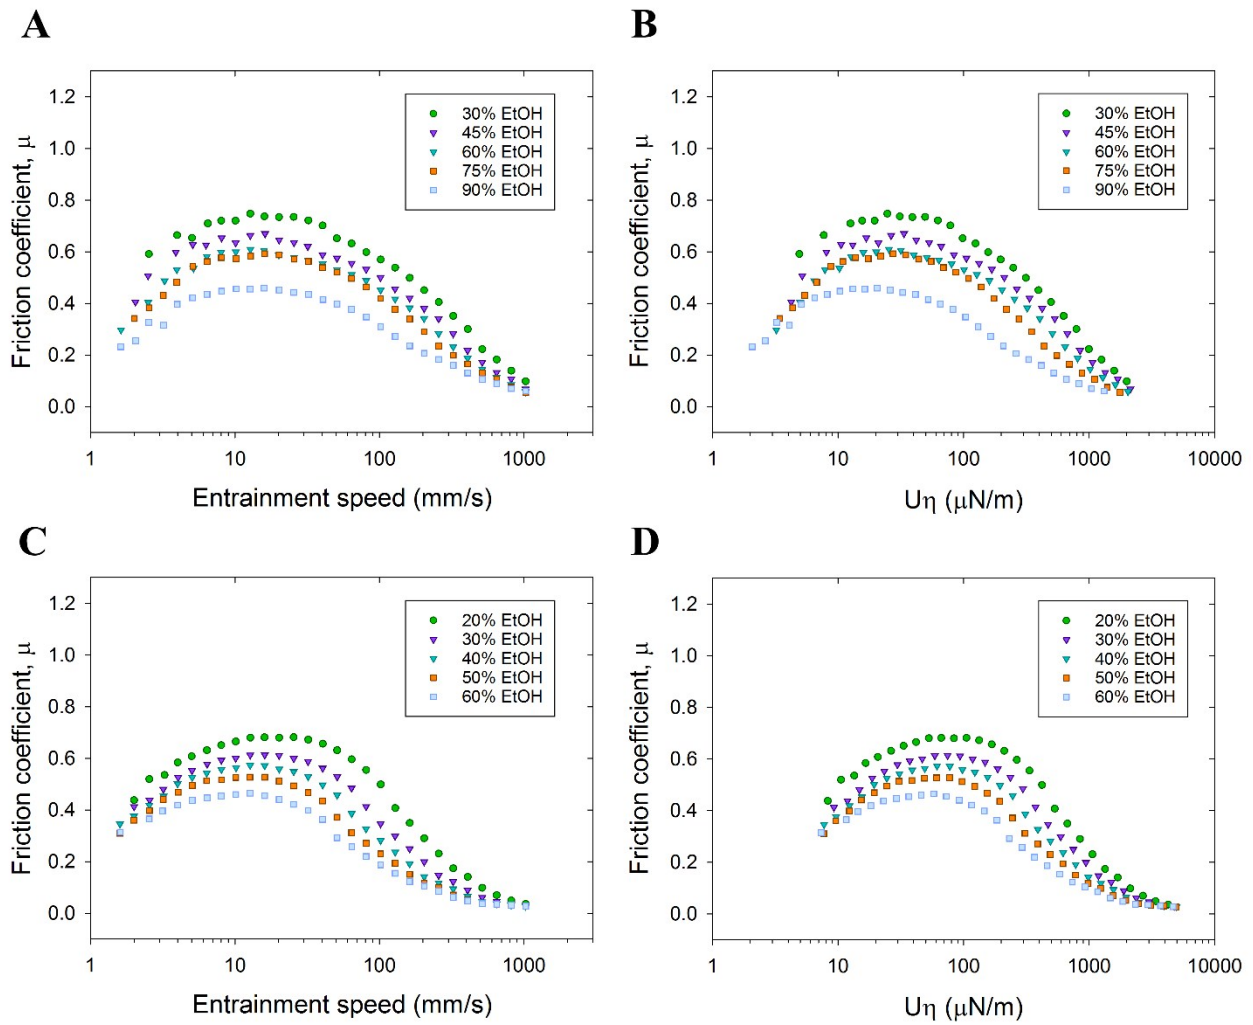

**Figure S4.** Friction profiles measured for the two glycerol-ethanol-water lubricant series in a rough PDMS-PDMS contact. Data for the low viscosity lubricants ( $\sim 1.8$  mPas) are shown as a function of (A) entrainment speed and (B) reduced velocity, and the corresponding data for the high viscosity lubricants ( $\sim 4.6$  mPas) in (C) and (D).
